# Supplementary material for: Racial and Ethnic Residential Segregation and Monocyte DNA Methylation Age Acceleration
Source: PubMed Central journal article supplement (PMC10687663; doi:10.1001/jamanetworkopen.2023.44722), 2023-11-29
Supplement: jamanetwopen-e2344722-s002.pdf [file jamanetwopen-e2344722-s002.pdf]

## Data Sharing Statement

Hicken. Racial and Ethnic Residential Segregation and Monocyte DNA Methylation Age Acceleration. *JAMA Netw Open*. Published November 29, 2023.

doi:10.1001/jamanetworkopen.2023.44722

### Data

**Data available:** Yes

**Data types:** Deidentified participant data

**How to access data:** MESA data are available by contacting the core center at <https://www.mesa-nhlbi.org/Publications.aspx>.

**When available:** With publication

### Supporting Documents

**Document types:** Statistical/analytic code

**How to access documents:** We will provide the code via GitHub.

**When available:** With publication

### Additional Information

**Who can access the data:** Link to code will be available to article readers.

**Types of analyses:** The code for all analyses in the published article will be available to readers.

**Mechanisms of data availability:** Data will be made available by request, by and at the discretion of the MESA Core Center.
